# Supplementary material
Source: HighWire-hosted journal article supplement (http://www.cmaj.ca/highwire/filestream/72670/field_highwire_adjunct_files/1/181173-res-2-at.pdf)
Supplement: 181173-res-2-at.pdf [file 181173-res-2-at.pdf]

**Appendix 2 (as supplied by the authors):** Table describing to whom clinical actions were directed (based on 149 reports)

| <u>Health care provider, total times engaged (n)</u> | <u>N of participants (%)</u> |
|------------------------------------------------------|------------------------------|
| Most responsible physician/resident, n=132           |                              |
| No involvement (n, %)                                | 64 (43.0%)                   |
| At least once (n, %)                                 | 85 (57.0%)                   |
| Occupational therapist, n=104                        |                              |
| No involvement (n, %)                                | 96 (64.4%)                   |
| At least once (n, %)                                 | 53 (35.6%)                   |
| Dietitian, n=71                                      |                              |
| No involvement (n, %)                                | 103 (69.1%)                  |
| At least once (n, %)                                 | 46 (30.9%)                   |
| Other, n=52                                          |                              |
| No involvement                                       | 114 (76.5%)                  |
| At least once                                        | 35 (23.5%)                   |
| Physiotherapist, n=47                                |                              |
| No involvement (n, %)                                | 126 (84.6%)                  |
| At least once (n, %)                                 | 23 (15.4%)                   |
| Pharmacist, n=35                                     |                              |
| No involvement (n, %)                                | 122 (81.9%)                  |
| At least once (n, %)                                 | 27 (18.1%)                   |
| In-clinic group, n=25                                |                              |
| No involvement (n, %)                                | 128 (85.9%)                  |
| At least once (n, %)                                 | 21 (14.1%)                   |
| System navigator, n=19                               |                              |
| No involvement                                       | 136 (91.3%)                  |
| At least once                                        | 13 (8.7%)                    |
| Nurse practitioner, n=17                             |                              |
| No involvement                                       | 138 (92.6%)                  |
| At least once                                        | 11 (7.4%)                    |
| Co-booked, n=9                                       |                              |
| No involvement                                       | 141 (94.6%)                  |
| At least once                                        | 8 (5.4%)                     |
| Community program, n=7                               |                              |
| No involvement (n, %)                                | 143 (96.0%)                  |
| At least once (n, %)                                 | 6 (4.0%)                     |
| Social worker, n=7                                   |                              |
| No involvement (n, %)                                | 145 (97.3%)                  |
| At least once (n, %)                                 | 4 (2.7%)                     |
| External specialist, n=5                             |                              |
| No involvement (n, %)                                | 144 (96.6%)                  |
| At least once (n, %)                                 | 5 (3.4%)                     |
| Geriatrician/ Geriatrics huddle, n=2                 |                              |
| No involvement (n, %)                                | 147 (98.7%)                  |
| At least once (n, %)                                 | 2 (1.3%)                     |
| Psychologist, n=0                                    |                              |
| No involvement (n, %)                                | 149 (100%)                   |
